# Supplementary material for: Au nanoparticle-embedded SiO2–Au@SiO2 catalysts with improved catalytic activity, enhanced stability to metal sintering and excellent recyclability
Source: Royal Society of Chemistry journal article supplement (doi:10.1039/c5ra07175e), 2015-01-01
Supplement: c5ra07175e1.pdf [file c5ra07175e1.pdf]

## Supporting Information

# **Au nanoparticle-embedded SiO<sub>2</sub>-Au@SiO<sub>2</sub> catalysts with improved catalytic activity, enhanced stability to metal sintering and excellent recyclability**

*Uiseok Jeong<sup>1</sup>, Ji Bong Joo<sup>2\*</sup>, Younghun Kim<sup>1\*</sup>*

*<sup>1</sup>Department of Chemical Engineering, Kwangwoon University, Seoul, 139-701, Republic of  
Korea*

*<sup>2</sup>Low Carbon Process Lab, Korea Institute of Energy Research, Deajeon, 305-343, Republic  
of Korea*

\*Corresponding authors (Tel: +82-42-860-3019, E-mail: [jbjoo@kier.re.kr](mailto:jbjoo@kier.re.kr), Tel: +82-2-940-  
5768, E-mail: [korea1@kw.ac.kr](mailto:korea1@kw.ac.kr) )

### Contents

- **Figure. S1-4.**

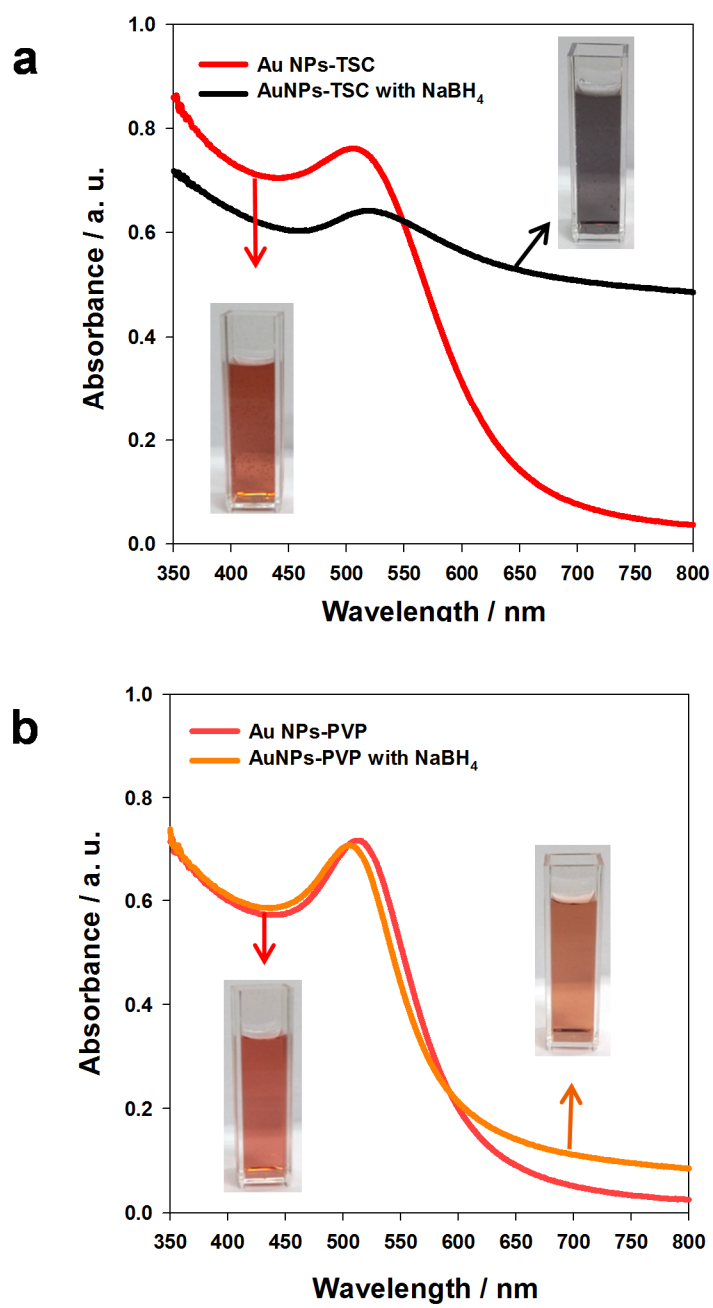

Figure S1. UV-Vis spectra changes and corresponding digital photo images of Au NP solutions by adding NaBH<sub>4</sub> solution: (a) Au NPs-TSC and (b) Au NPs-PVP

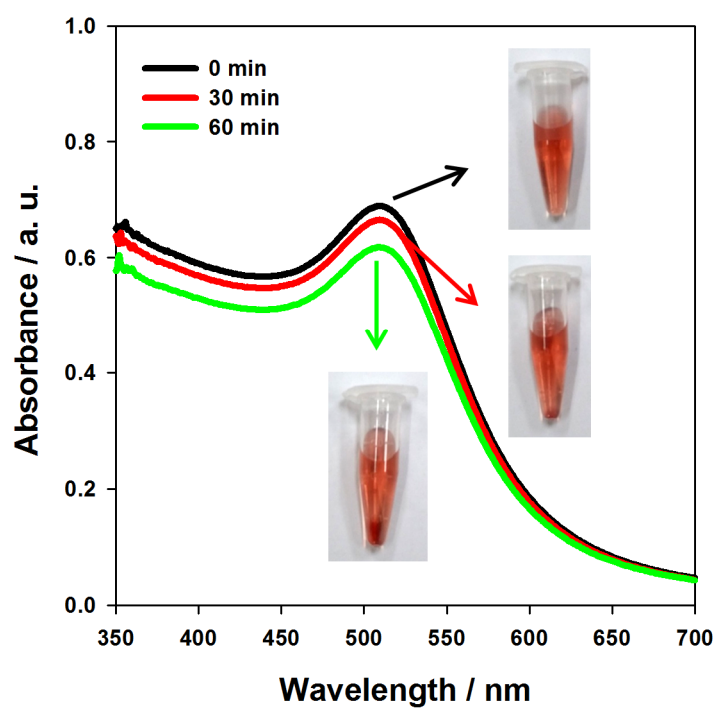

Figure S2. UV-Vis spectra changes and corresponding digital photo images of Au NPs-PVP sample after centrifugation at 13000 rpm with different periods.

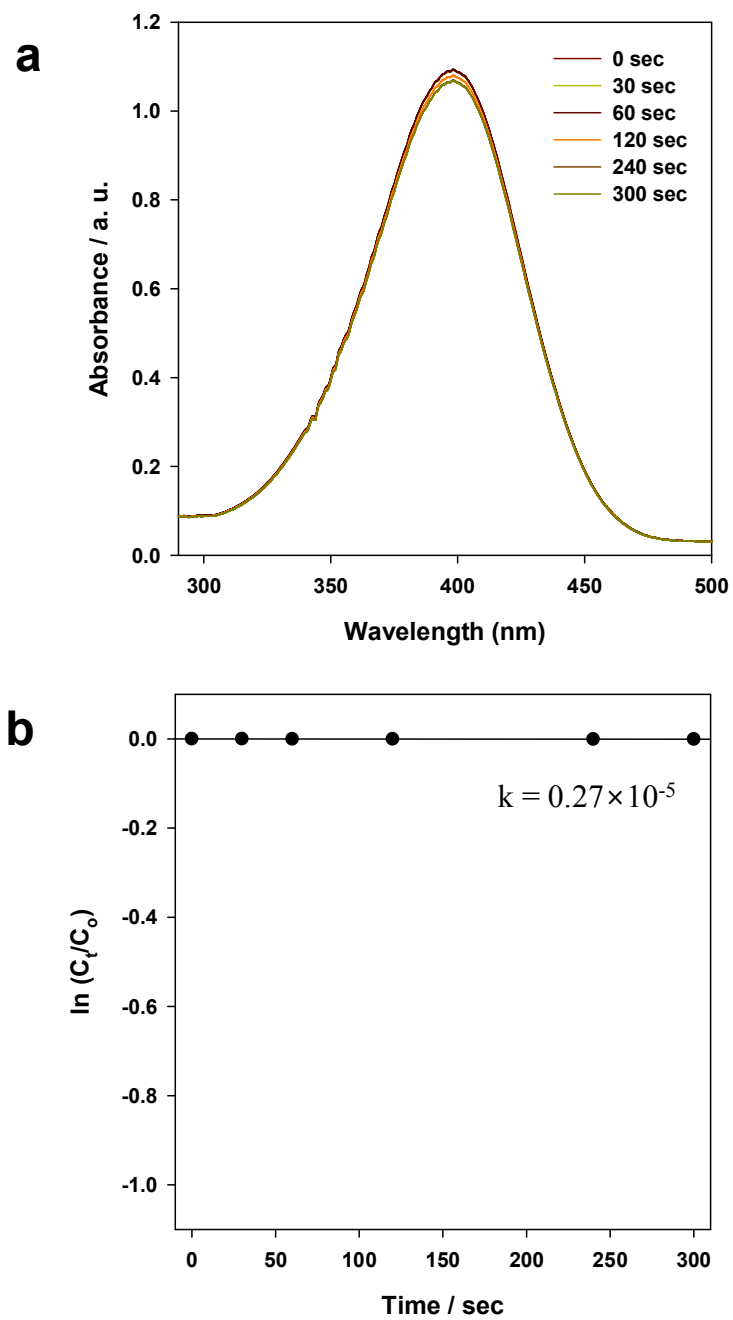

Figure S3. (a) UV-vis absorption spectra changes and (c) semi-logarithmic plot versus time on 4-NP degradation in the presence of Silica

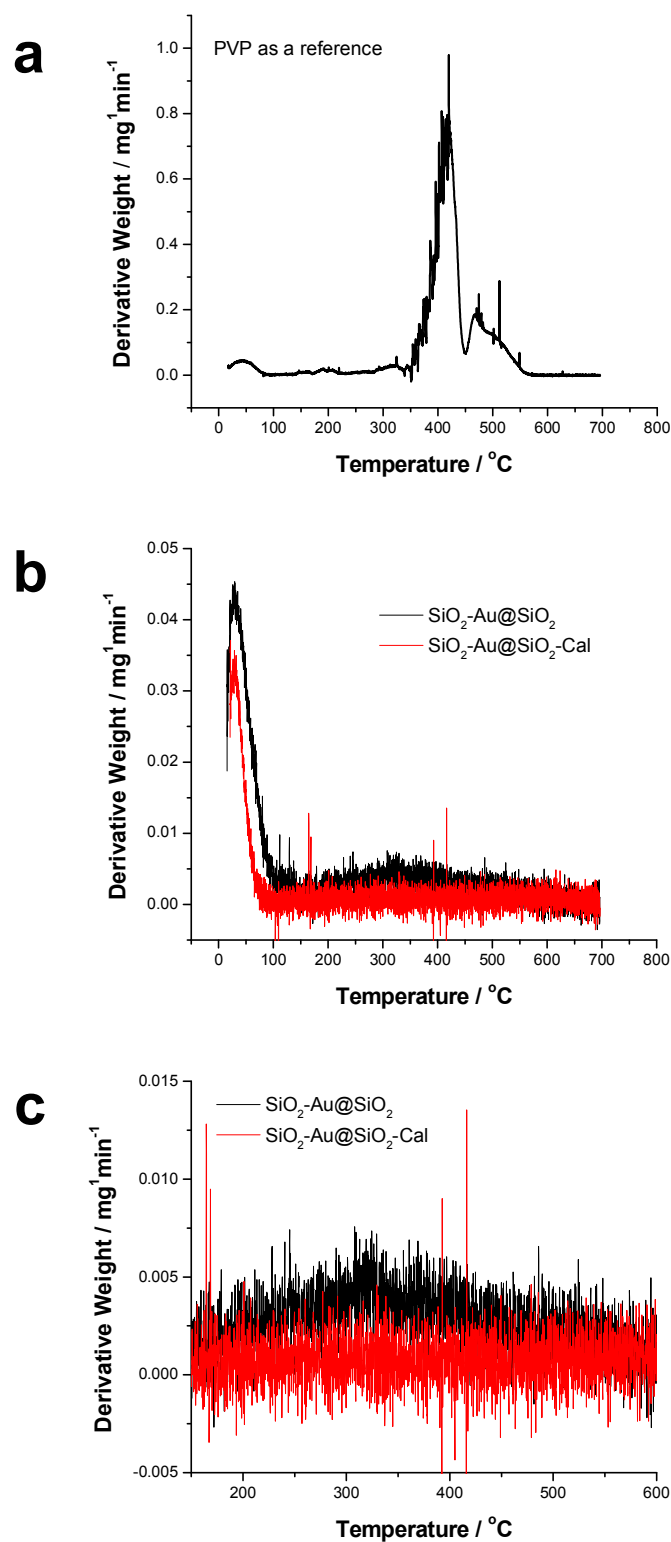

Figure S4. Derivative weight loss curves: (a) PVP polymer, (b-c) SiO<sub>2</sub>-Au@SiO<sub>2</sub> and SiO<sub>2</sub>-Au@SiO<sub>2</sub>-Cal. (c) is the expanded regions of 200 ~ 500 °C indicating that SiO<sub>2</sub>-Au@SiO<sub>2</sub> sample shows broad distribution curve with small peak. It means that small amount of embedded PVP should be burned out.
